# Supplementary material
Source: PubMed Central journal article supplement (PMC6371693)
Supplement: ehp3546.s001.acco.pdf [file ehp3546.s001.acco.pdf]

**Note to readers with disabilities:** *EHP* strives to ensure that all journal content is accessible to all readers. However, some figures and Supplemental Material published in *EHP* articles may not conform to [508 standards](#) due to the complexity of the information being presented. If you need assistance accessing journal content, please contact [ehp508@niehs.nih.gov](mailto:ehp508@niehs.nih.gov). Our staff will work with you to assess and meet your accessibility needs within 3 working days.

### **Supplemental Material**

#### **Community Water Fluoridation and Urinary Fluoride Concentrations in a National Sample of Pregnant Women in Canada**

Christine Till, Rivka Green, John G. Grundy, Richard Hornung, Raichel Neufeld, E. Angeles Martinez-Mier, Pierre Ayotte, Gina Muckle, and Bruce Lanphear

#### **Table of Contents**

**Table S1.** Characteristics of participants who drank tap water from a public water source and were included in the study and participants who were excluded because they reported a non-public drinking water source (well water or other). Data shown only for participants who provided three urine samples. Values are means  $\pm$  SD or n (%) unless otherwise indicated.

**Table S2.** Water treatment plant (WTP) reports of fluoride treatment by city. Lab analysis data reported for all sites.

**Table S3.** Geometric means (GM) (geometric standard deviation; GSD) by city and by year. Bolded N value refers to total number of participants in each city matched with WTP fluoride data. Non-bolded N refers to the number of participants receiving water from the specific WTP site.

**Table S4.** Fluoride concentrations in the urine of pregnant women from the MIREC cohort living in fluoridated versus non-fluoridated communities.

**Table S5.** Comparison of maternal urinary fluoride using propensity-score matching (Rosenbaum and Rubin 1983) as a function of residential fluoridation status matching on the covariates (BMI, maternal age, smoking status, of glasses of water, as well as amount of green and regular tea consumption).

**Figure S1.** Sample flow chart accounting for participants that were excluded from the regression analyses predicting maternal urinary fluoride adjusted for specific gravity (SG) or creatinine (CRE).

**Figure S2.** Sample map showing regions serviced by each WTP in Montreal

[http://ville.montreal.qc.ca/pls/portal/docs/PAGE\\_EAU\\_FR/MEDIA/DOCUMENTS/USINE-MOD-18-SEPT.PDF](http://ville.montreal.qc.ca/pls/portal/docs/PAGE_EAU_FR/MEDIA/DOCUMENTS/USINE-MOD-18-SEPT.PDF)

## **References**

**Table S1.** Characteristics of participants who drank tap water from a public water source and were included in the study and participants who were excluded because they reported a non-public drinking water source (well water or other). Data shown only for participants who provided three urine samples. Values are means  $\pm$  SD or n (%) unless otherwise indicated.

| Variable                          | Women reporting a public water drinking source | Women reporting a drinking water source other than public water source |
|-----------------------------------|------------------------------------------------|------------------------------------------------------------------------|
| N*                                | 1451                                           | 114                                                                    |
| Age (yrs) of mother at enrollment | 32.26 $\pm$ 4.98                               | 32.82 $\pm$ 4.4                                                        |
| Race                              |                                                |                                                                        |
| Caucasian                         | 1234 (85.0)                                    | 112 (98.2)                                                             |
| Other                             | 217 (15.0)                                     | 2 (1.8)                                                                |
| Marital Status                    |                                                |                                                                        |
| Married or Common law             | 1389 (95.7)                                    | 111 (97.4)                                                             |
| Widowed                           | 0 (0.0)                                        | 0 (0.0)                                                                |
| Divorced                          | 4 (0.3)                                        | 1 (0.9)                                                                |
| Separated                         | 3 (0.2)                                        | 0 (0.0)                                                                |
| Single                            | 54 (3.7)                                       | 2 (1.8)                                                                |
| Other                             | 1 (0.07)                                       | 0 (0.0)                                                                |
| Birth Country                     |                                                |                                                                        |
| Born in Canada                    | 1160 (79.9)                                    | 108 (94.7)                                                             |
| Born outside of Canada            | 291 (20.1)                                     | 6 (5.3)                                                                |
| Maternal Education                |                                                |                                                                        |
| High school or less               | 116 (8.0)                                      | 8 (7.1)                                                                |
| Some college                      | 74 (5.1)                                       | 4 (3.5)                                                                |
| College diploma                   | 322 (22.2)                                     | 34 (30.1)                                                              |
| University degree                 | 938 (64.7)                                     | 67 (59.3)                                                              |
| Missing                           | 1                                              | 1                                                                      |
| Pre-pregnancy BMI, mean $\pm$ SD  | 24.76 $\pm$ 5.41                               | 25.24 $\pm$ 5.58                                                       |

|                                          |             |             |
|------------------------------------------|-------------|-------------|
| Employed at time of pregnancy            | 1248 (86.0) | 100 (87.7)  |
| Net income household                     |             |             |
| >\$70,000                                | 983 (67.7)  | 83 (72.8)   |
| <\$70,000                                | 410 (28.3)  | 30 (26.3)   |
| Refuse to answer or don't know           | 58 (4.0)    | 1 (0.9)     |
| Smoking during trimester 1               |             |             |
| Current                                  | 70 (4.8)    | 7 (6.1)     |
| Former or never smoked                   | 1381 (95.2) | 107 (93.9)  |
| Smoking during trimester 3               |             |             |
| Current                                  | 64 (4.4)    | 5 (4.4)     |
| Former or never smoked                   | 1387 (95.6) | 109 (95.6)  |
| Gestational diabetes                     | 16 (1.1)    | 1 (0.9)     |
| Caffeine consumption (per day)           | 0.69 (0.87) | 0.71 (0.75) |
| 1 or more caffeinated beverage           | 1202 (83.0) | 99 ( )      |
| Did not drink caffeinated beverage       | 246 (17.0)  | 15 (13.1)   |
| Alcohol consumption (beer, wine, liquor) |             |             |
| No alcohol                               | 1188 (82.0) | 96 (84.2)   |
| <1 alcoholic drink per month             | 169 (11.7)  | 12 (10.5)   |
| ≥1 alcoholic beverage per month          | 91 (6.3)    | 6 (5.3)     |

Abbreviations: BMI = body mass index; SD = standard deviation; yrs = years

\* One participant did not report type of water they drank; this person was omitted from this table because it was not known which category they belonged to. Data not available for some covariates.

**Table S2.** Water treatment plant (WTP) reports of fluoride treatment by city. Lab analysis data reported for all sites.

| City                  | Notes about data collection                                                                                                                                                                                                                                                                                                                                                                                                                                                                                                                    |
|-----------------------|------------------------------------------------------------------------------------------------------------------------------------------------------------------------------------------------------------------------------------------------------------------------------------------------------------------------------------------------------------------------------------------------------------------------------------------------------------------------------------------------------------------------------------------------|
| Vancouver             | Fluoride levels for each WTP was documented at <0.05 mg/L for every time point measured between 2008 to 2011. The limit of detection (LoD) for fluoride at the WTPs was 0.05 mg/L. We used a correction factor, $LoD/\sqrt{2}$ (L.D. 1990), to calculate the water fluoride level for the Vancouver sites.                                                                                                                                                                                                                                     |
| Edmonton              | The geomean (GM) was calculated for each WTP in quarters. Because the distribution zones are only general estimates that fluctuate over time and because distribution zones often overlap, mean fluoride measurements were calculated using an average of the GMs from the 2 WTPs. Raw data used to calculate the GM were daily fluoride measurements.                                                                                                                                                                                         |
| Winnipeg              | The GM was calculated for each pumping station in quarters. Fluoridated drinking water values for participants that live in zones that receive water from more than one pumping station were calculated by averaging the GMs from the relevant stations. Raw data used to calculate the GM were daily fluoride measurements.                                                                                                                                                                                                                   |
| Toronto               | The GM was calculated for each WTP in quarters. Because the distribution zones are only general estimates that fluctuate over time and because distribution zones often overlap, fluoride measurements were calculated using an average of the GMs from the four WTPs. Raw data used to calculate the GM were daily fluoride measurements.                                                                                                                                                                                                     |
| Sudbury               | The GM was calculated for each WTP in quarters. Water distributed is a combination of water from two WTPs; therefore, fluoride measurements were calculated using an average of the GMs from both WTPs. Raw data used to calculate the GM were daily fluoride measurements                                                                                                                                                                                                                                                                     |
| Kingston              | The GM was calculated for each WTP in quarters. Fluoridated drinking water values for participants that live in zones that receive water from more than one WTP were calculated by averaging the GMs from the relevant plants. Raw data used to calculate the GM from King St WTP were fluoride measurements taken approximately five times per month in 2009 and less frequently, four times per year in the following years. Raw data used to calculate the GM from Point Pleasant WTP were fluoride measurements taken four times per year. |
| Montreal <sup>a</sup> | The GM was calculated for each WTP in quarters. Fluoridated drinking water values for participants that live in zones that receive water from more than one WTP were calculated by averaging the GMs from the relevant plants. Data used to calculate the GM from Atwater and Charles J Des Bailleurs WTPs were yearly average fluoride measurements provided by the city. Raw data used to calculate the GM for Dorval and Pointe-Claire WTPs were taken randomly, approximately every five days.                                             |
| Halifax               | The GM was calculated for each WTP in quarters. Fluoridated drinking water values                                                                                                                                                                                                                                                                                                                                                                                                                                                              |

|          |                                                                                                                                                                                                                                                                                                                                                                                                                                                                                                       |
|----------|-------------------------------------------------------------------------------------------------------------------------------------------------------------------------------------------------------------------------------------------------------------------------------------------------------------------------------------------------------------------------------------------------------------------------------------------------------------------------------------------------------|
|          | for participants that live in zones that receive water from more than one WTP were calculated by averaging the GMs from the relevant plants. Raw data used to calculate the GM were daily fluoride measurements.                                                                                                                                                                                                                                                                                      |
| Hamilton | The GM was calculated for each WTP in quarters. Raw data used to calculate the GM were fluoride measurements taken twice daily.                                                                                                                                                                                                                                                                                                                                                                       |
| Ottawa   | The GM was calculated for each WTP in quarters. Water distributed is a combination of water from two WTPs, therefore fluoride measurements were calculated using an average of the GMs from the two WTPs. Raw data used to calculate the GM from Lemieux WTP were daily fluoride measurements. Raw data used to calculate the GM from the East End WTP were fluoride measurements taken approximately twice per month in 2008 and less frequently, approximately once a month in the following years. |

<sup>a</sup> Two out of four of the WTPs in Montreal reported large gaps of time in which no fluoride measurements were taken. However, these two plants only supply water to three participants in our sample.

Abbreviations: GM = geometric mean; LoD = limit of detection; WTP = water treatment plant

**Table S3.** Geometric means (GM) (geometric standard deviation; GSD) by city and by year. Bolded N value refers to total number of participants in each city matched with WTP fluoride data. Non-bolded N refers to the number of participants receiving water from the specific WTP site.

| <b>Water Treatment Plant</b> | <b>Year</b> | <b>GM (GSD)</b> | <b>Range</b> | <b>N</b>        |
|------------------------------|-------------|-----------------|--------------|-----------------|
| <b><i>Fluoridated</i></b>    |             |                 |              |                 |
| <b>Edmonton</b>              |             |                 |              | — <sup>a</sup>  |
| E.L. Smith                   | 2010        | 0.71 (1.03)     | 0.65-0.75    |                 |
| E.L. Smith                   | 2011        | 0.55 (1.82)     | 0.09-0.78    |                 |
| Rossdale                     | 2010        | 0.71 (1.03)     | 0.62-0.77    |                 |
| Rossdale                     | 2011        | 0.70 (1.03)     | 0.63-0.76    |                 |
| <b>Hamilton</b>              |             |                 |              | <b>184</b>      |
| Highlift                     | 2008        | 0.68 (1.10)     | 0.37-0.96    |                 |
| Highlift                     | 2009        | 0.56 (1.07)     | 0.46-0.69    |                 |
| Highlift                     | 2010        | 0.56 (1.05)     | 0.46-0.64    |                 |
| Highlift                     | 2011        | 0.56 (1.05)     | 0.38-0.66    |                 |
| Highlift                     | 2012        | 0.57 (1.10)     | 0.36-0.81    |                 |
| <b>Halifax</b>               |             |                 |              | <b>138</b>      |
| J.D Kline                    | 2008        | 0.82 (1.17)     | 0.26-1.32    | 93 <sup>b</sup> |
| J.D Kline                    | 2009        | 0.77 (1.16)     | 0.33-1.10    |                 |
| J.D Kline                    | 2010        | 0.71 (1.19)     | 0.27-1.04    |                 |
| J.D Kline                    | 2011        | 0.75 (1.18)     | 0.28-1.00    |                 |
| Lake Major                   | 2008        | 0.76 (1.12)     | 0.33-0.93    | 46 <sup>b</sup> |
| Lake Major                   | 2009        | 0.69 (1.30)     | 0.05-1.03    |                 |
| Lake Major                   | 2010        | 0.62 (1.17)     | 0.25-0.93    |                 |
| Lake Major                   | 2011        | 0.65(1.20)      | 0.11-1.18    |                 |

|                 |      |             |           |            |
|-----------------|------|-------------|-----------|------------|
| <b>Montreal</b> |      |             |           | — a        |
| Pointe-Claire   | 2009 | 0.67 (1.10) | 0.47-0.75 |            |
| Pointe-Claire   | 2010 | 0.69 (1.08) | 0.53-0.79 |            |
| Dorval          | 2009 | 0.62 (1.25) | 0.21-0.82 |            |
| Dorval          | 2010 | 0.61 (1.10) | 0.44-0.77 |            |
| <b>Ottawa</b>   |      |             |           | <b>71</b>  |
| Lemieux         | 2008 | 0.73 (1.04) | 0.60-0.85 |            |
| Lemieux         | 2009 | 0.73 (1.05) | 0.61-0.83 |            |
| Lemieux         | 2010 | 0.68 (1.04) | 0.58-0.80 |            |
| Lemieux         | 2011 | 0.67 (1.04) | 0.54-0.76 |            |
| East End        | 2008 | 0.69 (1.46) | 0.07-0.81 |            |
| East End        | 2009 | 0.74 (1.07) | 0.69-0.84 |            |
| East End        | 2010 | 0.71 (1.03) | 0.67-0.74 |            |
| East End        | 2011 | 0.71 (1.04) | 0.65-0.74 |            |
| <b>Sudbury</b>  |      |             |           | <b>44</b>  |
| Wanapitei       | 2008 | 0.61 (1.56) | 0.08-1.15 |            |
| Wanapitei       | 2009 | 0.67 (1.26) | 0.26-0.97 |            |
| Wanapitei       | 2010 | 0.59 (1.20) | 0.37-0.91 |            |
| Wanapitei       | 2011 | 0.56 (1.40) | 0.21-0.91 |            |
| David Street    | 2008 | 0.61 (1.56) | 0.08-1.15 |            |
| David Street    | 2009 | 0.67 (1.26) | 0.26-0.97 |            |
| David Street    | 2010 | 0.59 (1.20) | 0.37-0.91 |            |
| David Street    | 2011 | 0.57 (1.40) | 0.21-0.91 |            |
| <b>Toronto</b>  |      |             |           | <b>283</b> |
| R.L. Clark      | 2008 | 0.41 (1.57) | 0.10-0.59 |            |
| R.L. Clark      | 2009 | 0.40 (1.74) | 0.12-0.62 |            |



|                 |      |             |           |                 |
|-----------------|------|-------------|-----------|-----------------|
| R.L. Clark      | 2010 | 0.51 (1.52) | 0.10-0.73 |                 |
| R.L. Clark      | 2011 | 0.50 (1.51) | 0.12-0.70 |                 |
| R.L. Clark      | 2012 | 0.56 (1.21) | 0.17-0.69 |                 |
| Island          | 2008 | 0.53 (1.31) | 0.13-2.0  |                 |
| Island          | 2009 | 0.46 (1.78) | 0.11-0.68 |                 |
| Island          | 2010 | 0.57 (1.40) | 0.12-0.78 |                 |
| Island          | 2011 | 0.61 (1.10) | 0.21-0.70 |                 |
| Island          | 2012 | 0.58 (1.27) | 0.15-0.70 |                 |
| F.J. Horgan     | 2008 | 0.48 (1.25) | 0.13-1.51 |                 |
| F.J. Horgan     | 2009 | 0.41 (1.64) | 0.12-1.93 |                 |
| F.J. Horgan     | 2010 | 0.46 (1.51) | 0.13-0.68 |                 |
| F.J. Horgan     | 2011 | 0.36 (1.77) | 0.13-0.68 |                 |
| F.J. Horgan     | 2012 | 0.40 (1.64) | 0.14-0.63 |                 |
| R.C. Harris     | 2008 | 0.48 (1.29) | 0.10-0.60 |                 |
| R.C. Harris     | 2009 | 0.38 (1.94) | 0.11-0.63 |                 |
| R.C. Harris     | 2010 | 0.60 (1.13) | 0.18-0.73 |                 |
| R.C. Harris     | 2011 | 0.56 (1.32) | 0.14-0.68 |                 |
| R.C. Harris     | 2012 | 0.47 (1.75) | 0.12-0.70 |                 |
| <b>Winnipeg</b> |      |             |           | <b>72</b>       |
| Maclean         | 2009 | 0.83 (1.05) | 0.59-0.92 | 38 <sup>b</sup> |
| Maclean         | 2010 | 0.84 (1.03) | 0.79-0.88 |                 |
| Maclean         | 2011 | 0.72 (1.08) | 0.63-0.86 |                 |
| Maclean         | 2012 | 0.70 (1.03) | 0.66-0.75 |                 |
| McPhillips      | 2009 | 0.84 (1.05) | 0.73-0.94 | 25 <sup>b</sup> |
| McPhillips      | 2010 | 0.83 (1.03) | 0.78-0.88 |                 |
| McPhillips      | 2011 | 0.72 (1.07) | 0.59-0.86 |                 |
| McPhillips      | 2012 | 0.70 (1.03) | 0.66-0.74 |                 |

|                                                |         |                    |           |                  |
|------------------------------------------------|---------|--------------------|-----------|------------------|
| Hurst                                          | 2009    | 0.83 (1.05)        | 0.74-0.93 | 46 <sup>b</sup>  |
| Hurst                                          | 2010    | 0.86 (1.04)        | 0.78-1.01 |                  |
| Hurst                                          | 2011    | 0.71 (1.10)        | 0.57-0.90 |                  |
| Hurst                                          | 2012    | 0.7 (1.03)         | 0.64-0.76 |                  |
| <i>Non-fluoridated</i>                         |         |                    |           |                  |
| <b>Vancouver</b>                               |         |                    |           | <b>154</b>       |
| Seymour                                        | 2008-11 | 0.035 <sup>c</sup> | n/a       |                  |
| Capilano                                       | 2008-11 | 0.035 <sup>c</sup> | n/a       |                  |
| Coquitlam                                      | 2008-11 | 0.035 <sup>c</sup> | n/a       |                  |
| <b>Kingston</b>                                |         |                    |           | <b>184</b>       |
| King Street                                    | 2009    | 0.16 (2.04)        | 0.02-0.43 | 143 <sup>b</sup> |
| King Street                                    | 2010    | 0.20 (1.00)        | 0.20-0.20 |                  |
| King Street                                    | 2011    | 0.17 (1.41)        | 0.10-0.20 |                  |
| King Street                                    | 2012    | 0.20 (1.00)        | 0.20-0.20 |                  |
| Point Pleasant                                 | 2009    | 0.20 (1.00)        | 0.20-0.20 | 113 <sup>b</sup> |
| Point Pleasant                                 | 2010    | 0.20 (1.00)        | 0.20-0.20 |                  |
| Point Pleasant                                 | 2011    | 0.19 (1.58)        | 0.10-0.30 |                  |
| Point Pleasant                                 | 2012    | 0.20 (1.22)        | 0.20-0.30 |                  |
| <b>Montreal</b>                                |         |                    |           | <b>208</b>       |
| Atwater & Charles-J Des Bailleurs <sup>d</sup> | 2008    | 0.13               | 0.11-0.15 |                  |
| Atwater & Charles-J Des Bailleurs <sup>d</sup> | 2009    | 0.13               | 0.13-0.13 |                  |
| Atwater & Charles-J Des Bailleurs <sup>d</sup> | 2010    | 0.13               | 0.13-0.13 |                  |
| Atwater & Charles-J Des Baillet <sup>d</sup>   | 2011    | 0.11               | 0.11-0.11 |                  |

|                           |  |  |  |             |
|---------------------------|--|--|--|-------------|
| Total WTP fluoride values |  |  |  | <b>1359</b> |
|---------------------------|--|--|--|-------------|

<sup>a</sup> MIREC minimum sample size requirements precluded reporting of small sample sizes for these sites.

<sup>b</sup> Refers to number of participants receiving water from the WTP. Participants can receive water from more than one WTP because some water distribution zones overlap.

<sup>c</sup> Limit of detection (LoD) is 0.05 mg/L for Vancouver sites. Values reported in the table for measurements below the LoD used an imputed value of  $(\text{LoD}/\sqrt{2})$  (Hornung and Reed 1990) to calculate the water fluoride level. No variation reported because only LoD was provided for this site.

<sup>d</sup> Annual average reported by this WTP site

**Table S4.** Fluoride concentrations in the urine of pregnant women from the MIREC cohort living in fluoridated versus non-fluoridated communities.

|                        | Trimester      | N   | Arith<br>Mean | Arith<br>SD | Geo<br>Mean | Geo<br>SD | Min  | 5%   | 25%  | 50%  | 75%  | 95%  | Max  |
|------------------------|----------------|-----|---------------|-------------|-------------|-----------|------|------|------|------|------|------|------|
| <b>NON-FLUORIDATED</b> |                |     |               |             |             |           |      |      |      |      |      |      |      |
| MUF_Unadjusted         | 1              | 541 | 0.24          | 0.29        | 0.15        | 2.65      | 0.01 | 0.03 | 0.08 | 0.15 | 0.30 | 0.69 | 3.56 |
|                        | 2              | 509 | 0.32          | 0.33        | 0.23        | 2.22      | 0.03 | 0.06 | 0.13 | 0.22 | 0.38 | 0.90 | 3.54 |
|                        | 3              | 476 | 0.47          | 0.39        | 0.36        | 2.05      | 0.04 | 0.11 | 0.22 | 0.36 | 0.60 | 1.23 | 3.77 |
| MUF <sub>SG</sub>      | 1              | 541 | 0.31          | 0.39        | 0.20        | 2.56      | 0.01 | 0.04 | 0.12 | 0.20 | 0.35 | 0.84 | 4.67 |
|                        | 2              | 507 | 0.39          | 0.32        | 0.31        | 1.89      | 0.04 | 0.12 | 0.21 | 0.29 | 0.46 | 0.96 | 2.44 |
|                        | 3              | 475 | 0.48          | 0.32        | 0.40        | 1.78      | 0.08 | 0.17 | 0.28 | 0.38 | 0.56 | 1.09 | 2.71 |
| MUF <sub>CRE_1</sub>   | 1              | 533 | 0.50          | 0.50        | 0.35        | 2.40      | 0.01 | 0.08 | 0.22 | 0.37 | 0.60 | 1.41 | 4.5  |
|                        | 2              | 502 | 0.58          | 0.44        | 0.48        | 1.85      | 0.06 | 0.19 | 0.31 | 0.46 | 0.69 | 1.47 | 3.31 |
|                        | 3 <sup>a</sup> | 386 | 0.67          | 0.47        | 0.56        | 1.75      | 0.12 | 0.24 | 0.40 | 0.54 | 0.79 | 1.45 | 4.61 |
| MUF <sub>CRE_2</sub>   | 1              | 534 | 0.41          | 0.45        | 0.29        | 2.42      | 0.01 | 0.06 | 0.18 | 0.30 | 0.49 | 1.15 | 4.81 |
|                        | 2              | 502 | 0.43          | 0.32        | 0.35        | 1.85      | 0.04 | 0.14 | 0.23 | 0.34 | 0.51 | 1.08 | 2.43 |
|                        | 3 <sup>a</sup> | 386 | 0.48          | 0.33        | 0.40        | 1.75      | 0.08 | 0.17 | 0.29 | 0.39 | 0.56 | 1.04 | 3.29 |
| <b>FLUORIDATED</b>     |                |     |               |             |             |           |      |      |      |      |      |      |      |
| MUF_Unadjusted         | 1              | 762 | 0.57          | 0.49        | 0.40        | 2.57      | 0.02 | 0.06 | 0.23 | 0.43 | 0.79 | 1.48 | 3.98 |
|                        | 2              | 728 | 0.71          | 0.53        | 0.56        | 2.03      | 0.04 | 0.17 | 0.35 | 0.56 | 0.89 | 1.68 | 3.77 |
|                        | 3              | 712 | 0.82          | 0.60        | 0.63        | 2.04      | 0.11 | 0.19 | 0.39 | 0.64 | 1.06 | 1.99 | 4.36 |
| MUF <sub>SG</sub>      | 1              | 762 | 0.52          | 0.46        | 0.37        | 2.44      | 0.01 | 0.07 | 0.25 | 0.4  | 0.64 | 1.30 | 3.84 |
|                        | 2              | 728 | 0.71          | 0.47        | 0.59        | 1.84      | 0.03 | 0.23 | 0.40 | 0.58 | 0.87 | 1.63 | 3.78 |
|                        | 3              | 711 | 0.88          | 0.55        | 0.74        | 1.81      | 0.08 | 0.27 | 0.51 | 0.77 | 1.08 | 1.89 | 3.97 |
| MUF <sub>CRE_1</sub>   | 1              | 757 | 0.83          | 0.68        | 0.60        | 2.44      | 0.01 | 0.12 | 0.39 | 0.65 | 1.09 | 2.19 | 4.89 |
|                        | 2              | 723 | 1.13          | 0.77        | 0.93        | 1.91      | 0.05 | 0.32 | 0.61 | 0.91 | 1.42 | 2.63 | 4.89 |
|                        | 3 <sup>a</sup> | 546 | 1.30          | 0.82        | 1.10        | 1.86      | 0.12 | 0.41 | 0.72 | 1.08 | 1.63 | 3.10 | 4.63 |
| MUF <sub>CRE_2</sub>   | 1              | 759 | 0.68          | 0.58        | 0.49        | 2.46      | 0.01 | 0.09 | 0.31 | 0.53 | 0.88 | 1.80 | 4.61 |
|                        | 2              | 727 | 0.85          | 0.60        | 0.69        | 1.92      | 0.04 | 0.24 | 0.45 | 0.67 | 1.05 | 2.00 | 4.66 |
|                        | 3 <sup>a</sup> | 553 | 0.97          | 0.68        | 0.80        | 1.90      | 0.09 | 0.29 | 0.52 | 0.78 | 1.18 | 2.41 | 4.78 |

<sup>a</sup> Trimester 3 creatinine was analyzed at a separate lab, which reflects the lower sample size relative to trimesters 1 and 2

Abbreviations: MUF<sub>SG</sub>: maternal urinary fluoride adjusted for specific gravity; MUF<sub>CRE\_1</sub>: maternal urinary fluoride adjusted for creatinine using the Hauser et al. (2004) method; MUF<sub>CRE\_2</sub>: maternal urinary fluoride adjusted for creatinine using the WHO (2014) method

Note: Means were calculated after removing outliers defined as a MUF concentration  $\geq 5$ . The calculation of MUF<sub>CRE\_1</sub> was more prone to outliers relative to MUF<sub>CRE\_2</sub> which explains the slight differences in sample size between the two methods.

**Table S5.** Comparison of maternal urinary fluoride using propensity-score matching (Rosenbaum and Rubin 1983) as a function of residential fluoridation status matching on the covariates (BMI, maternal age, smoking status, of glasses of water, as well as amount of green and regular tea consumption).

| Fluoride measure     | <u>Fluoridated</u> |      |        |      | <u>Non-fluoridated</u> |      |        |      | <i>F</i> | <i>p</i> |
|----------------------|--------------------|------|--------|------|------------------------|------|--------|------|----------|----------|
|                      | N                  | Mean | Median | SD   | N                      | Mean | Median | SD   |          |          |
| MUF_Unadjusted       | 426                | 0.68 | 0.58   | 0.41 | 426                    | 0.35 | 0.28   | 0.24 | 340.7    | < 0.0001 |
| MUF <sub>SG</sub>    | 339                | 0.73 | 0.63   | 0.41 | 339                    | 0.42 | 0.34   | 0.38 | 279.6    | < 0.0001 |
| MUF <sub>CRE_1</sub> | 339                | 1.22 | 1.03   | 0.69 | 339                    | 0.63 | 0.51   | 0.48 | 277.0    | < 0.0001 |
| MUF <sub>CRE_2</sub> | 339                | 0.91 | 0.77   | 0.52 | 339                    | 0.47 | 0.39   | 0.35 | 273.6    | < 0.0001 |

\*Units: MUF\_Unadjusted =mg/L; MUF<sub>SG</sub> = mg/L; MUF<sub>CRE\_1</sub> = mg/g; MUF<sub>CRE\_2</sub> = mg/L

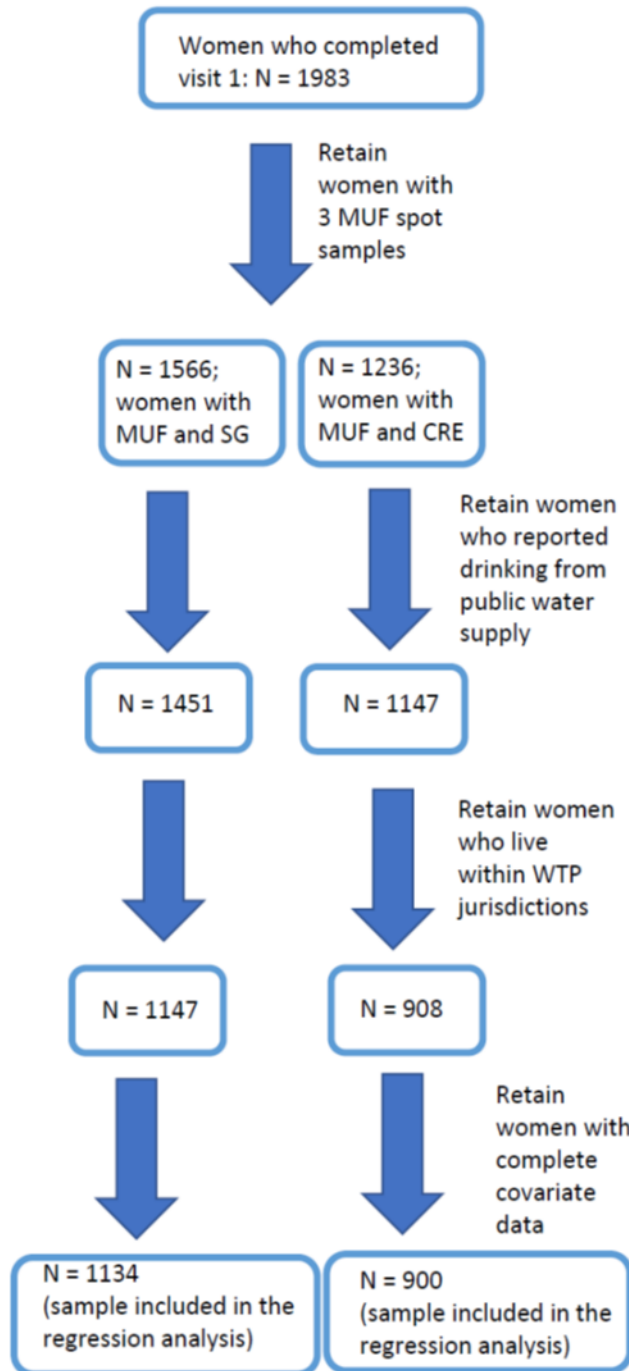

**Figure S1.** Sample flow chart accounting for participants that were excluded from the regression analyses predicting maternal urinary fluoride adjusted for specific gravity (SG) or creatinine (CRE).



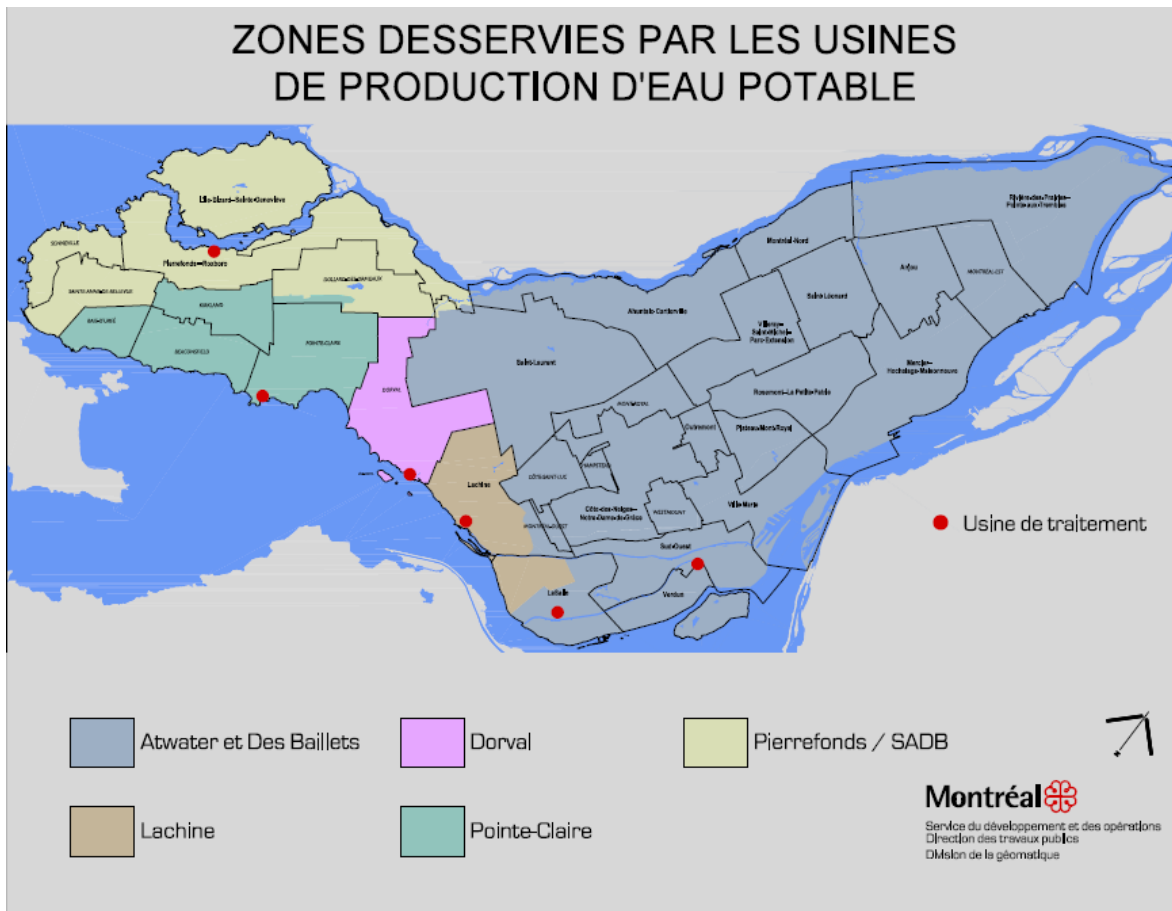

**Figure S2.** Sample map showing regions serviced by each WTP in Montreal

[http://ville.montreal.qc.ca/pls/portal/docs/PAGE/EAU\\_FR/MEDIA/DOCUMENTS/USI-NE-MOD-18-SEPT.PDF](http://ville.montreal.qc.ca/pls/portal/docs/PAGE/EAU_FR/MEDIA/DOCUMENTS/USI-NE-MOD-18-SEPT.PDF)

## References

- Hauser R, Meeker JD, Park S, Silva MJ, Calafat AM. 2004. Temporal variability of urinary phthalate metabolite levels in men of reproductive age. *Environ Health Perspect* 112:1734–1740.
- Hornung RW, Reed LD. 1990. Estimation of Average Concentration in the Presence of Nondetectable Values. *Appl. Occup Environ Hyg* 5:46–51.
- Rosenbaum PR, Rubin DB. 1983. The central role of the propensity score in observational studies for causal effects. *Biometrika* 70:41–55.
- World Health Organization (WHO). 2014. Basic methods for assessment of renal fluoride excretion in community prevention programmes for oral health. WHO Press, Switzerland. [www.who.int/about/licensing/copyright\\_form/en/index.html](http://www.who.int/about/licensing/copyright_form/en/index.html)
