# Supplementary material
Source: PubMed Central journal article supplement (PMC6371693)
Supplement: ehp3546.smcontents.508.pdf [file ehp3546.smcontents.508.pdf]

**Note to readers with disabilities:** *EHP* strives to ensure that all journal content is accessible to all readers. However, some figures and Supplemental Material published in *EHP* articles may not conform to [508 standards](#) due to the complexity of the information being presented. If you need assistance accessing journal content, please contact [ehp508@niehs.nih.gov](mailto:ehp508@niehs.nih.gov). Our staff will work with you to assess and meet your accessibility needs within 3 working days.

### **Supplemental Material**

#### **Community Water Fluoridation and Urinary Fluoride Concentrations in a National Sample of Pregnant Women in Canada**

Christine Till, Rivka Green, John G. Grundy, Richard Hornung, Raichel Neufeld, E. Angeles Martinez-Mier, Pierre Ayotte, Gina Muckle, and Bruce Lanphear

#### **Table of Contents**

**Table S1.** Characteristics of participants who drank tap water from a public water source and were included in the study and participants who were excluded because they reported a non-public drinking water source (well water or other). Data shown only for participants who provided three urine samples. Values are means  $\pm$  SD or n (%) unless otherwise indicated.

**Table S2.** Water treatment plant (WTP) reports of fluoride treatment by city. Lab analysis data reported for all sites.

**Table S3.** Geometric means (GM) (geometric standard deviation; GSD) by city and by year. Bolded N value refers to total number of participants in each city matched with WTP fluoride data. Non-bolded N refers to the number of participants receiving water from the specific WTP site.

**Table S4.** Fluoride concentrations in the urine of pregnant women from the MIREC cohort living in fluoridated versus non-fluoridated communities.

**Table S5.** Comparison of maternal urinary fluoride using propensity-score matching (Rosenbaum and Rubin 1983) as a function of residential fluoridation status matching on the covariates (BMI, maternal age, smoking status, of glasses of water, as well as amount of green and regular tea consumption).

**Figure S1.** Sample flow chart accounting for participants that were excluded from the regression analyses predicting maternal urinary fluoride adjusted for specific gravity (SG) or creatinine (CRE).

**Figure S2.** Sample map showing regions serviced by each WTP in Montreal

[http://ville.montreal.qc.ca/pls/portal/docs/PAGE\\_EAU\\_FR/MEDIA/DOCUMENTS/USINE-MOD-18-SEPT.PDF](http://ville.montreal.qc.ca/pls/portal/docs/PAGE_EAU_FR/MEDIA/DOCUMENTS/USINE-MOD-18-SEPT.PDF)

## **References**
